# Supplementary material
Source: PubMed Central journal article supplement (PMC1595433)

FLASH

NPAT

FLASH/NPAT/DAPI

hFibr

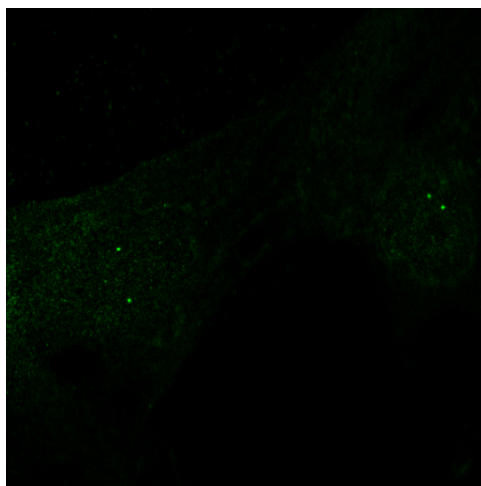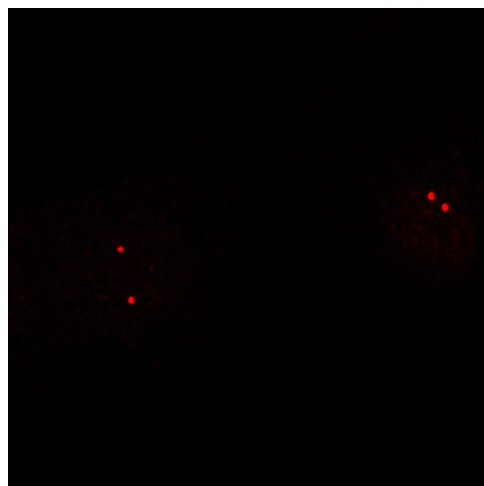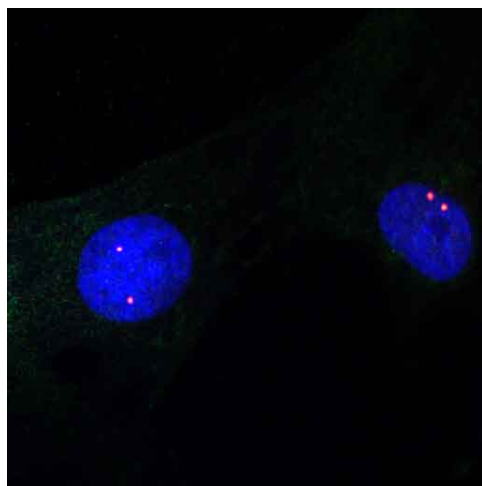

HeLa

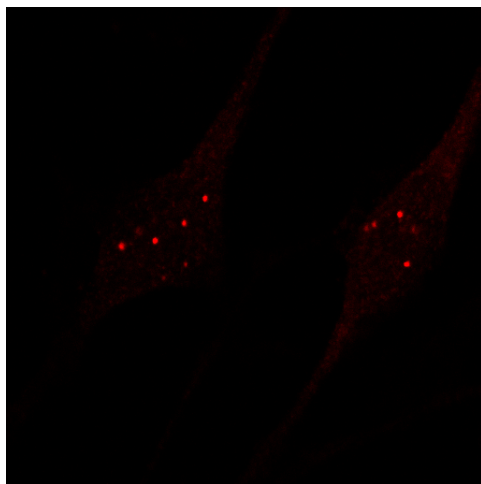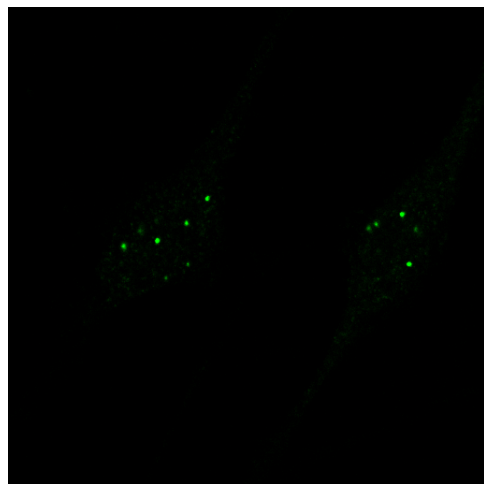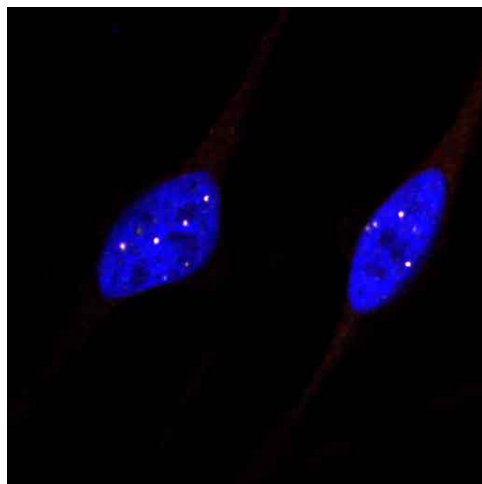

IMR90

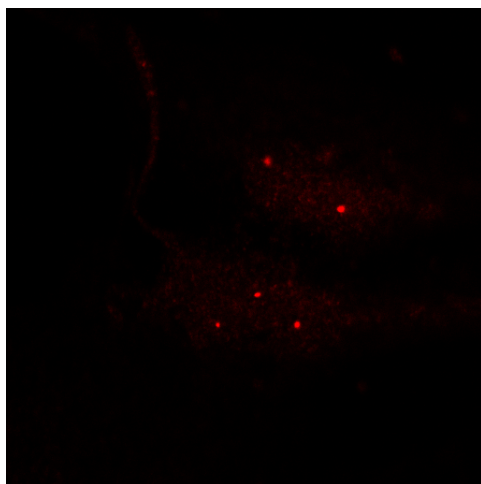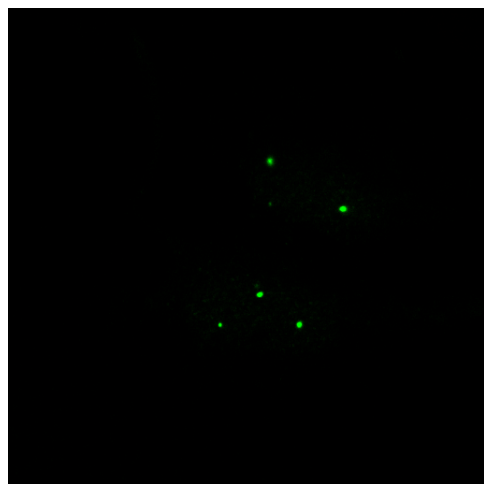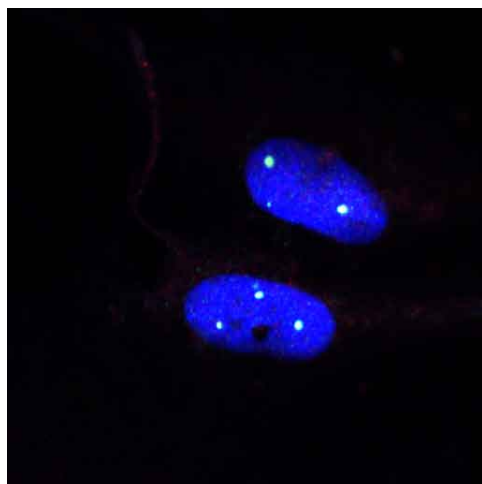

HaCat

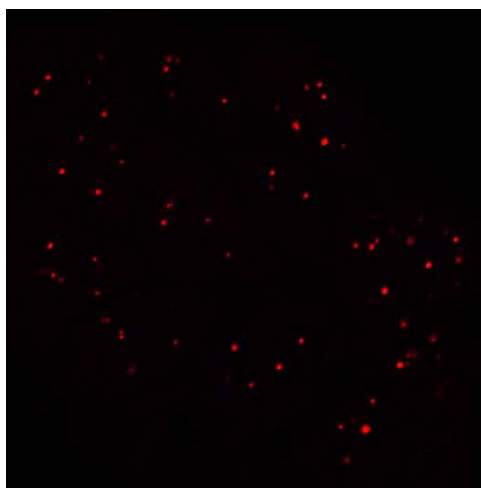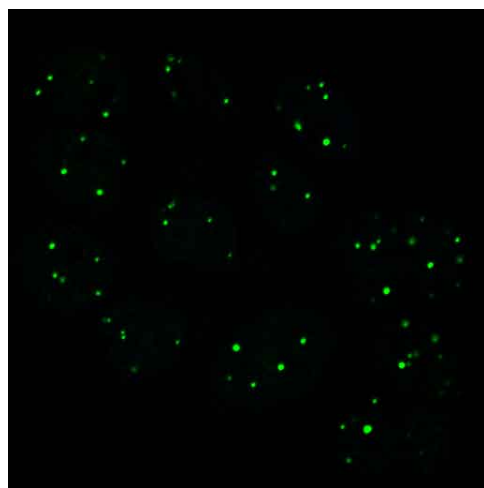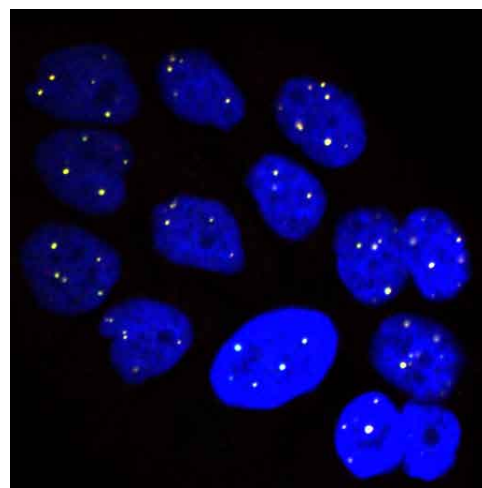

Supplement: pnas_0604227103_2.pdf [file pnas_0604227103_2.pdf]

Number of events

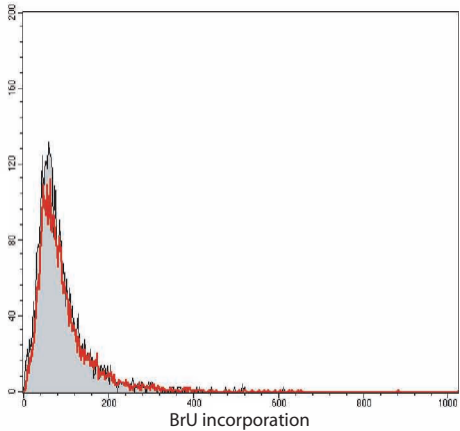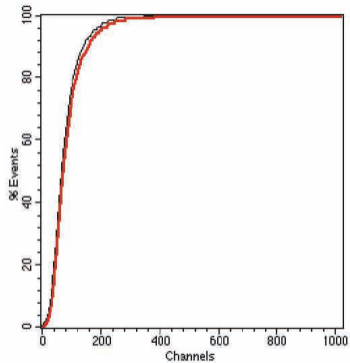

Supplement: pnas_0604227103_3.pdf [file pnas_0604227103_3.pdf]
